# Supplementary material
Source: PubMed Central journal article supplement (PMC8384658)
Supplement: NIHMS1702364-supplement-1.pdf [file NIHMS1702364-supplement-1.pdf]

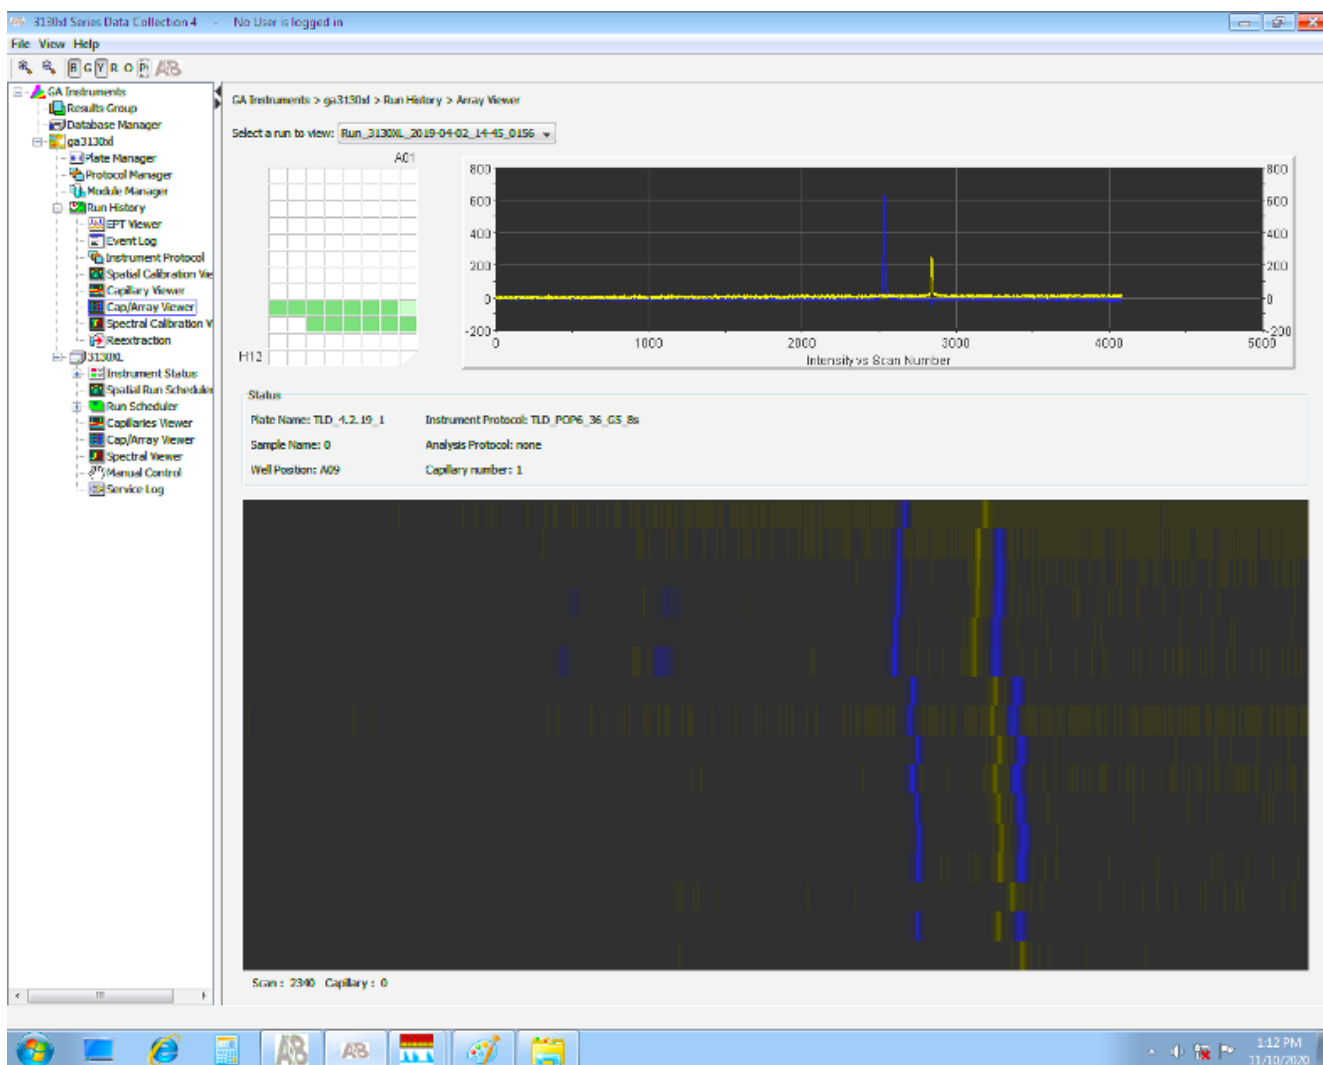

**Figure S1: Variability between retention times of products in different capillaries.** A screenshot from the 3130XL Data Collection software in the capillary array viewer is shown. FAM peaks are shown in blue and Cy3 internal standard peaks are shown in yellow. The experiment shown has two peaks, however the retention time varies between capillaries.

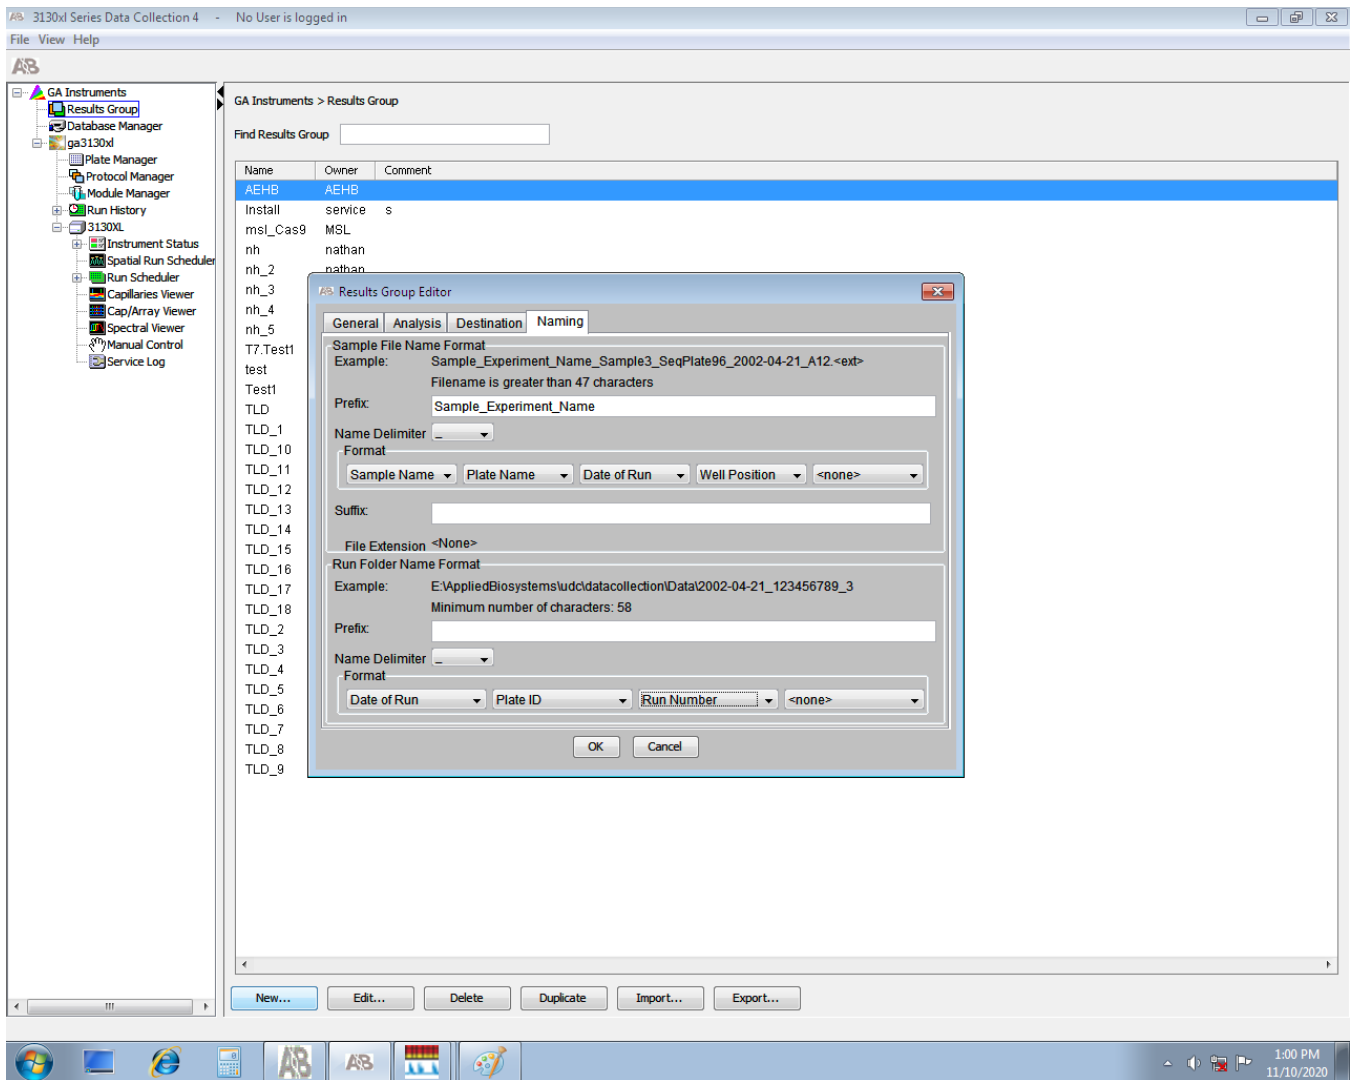

**Figure S2: Results Group Editor Settings:** Suggested settings for the results group are shown in the results group editor for the 3130XL Data Collection software. Any values can be input in the general, analysis, and destination tabs. In the naming tab, it is important the Name delimiter be set to \_ and that the sample name appears in the format for the sample file name. This is needed for subsequent analysis using our software.
